# Supplementary material
Source: publisher figshare collection journal article supplement (https://sage.figshare.com/ndownloader/files/17636501)
Supplement: Supplementary file 1 [file 17636501]

**Appendix B:** First occurrence of derivations by age group – child data (number of derivations indicated before the list of items)

| Suffix                                      | PoS       | 2;0 – 2;6                                                                                                                                                                                                                                        | 3;0 – 3;6                                                                                                                    | 4;0 – 4;6                                                                                                                     | 5;0 – 5;6                              |
|---------------------------------------------|-----------|--------------------------------------------------------------------------------------------------------------------------------------------------------------------------------------------------------------------------------------------------|------------------------------------------------------------------------------------------------------------------------------|-------------------------------------------------------------------------------------------------------------------------------|----------------------------------------|
| -able                                       | adj       | 0                                                                                                                                                                                                                                                | 1: uncomfortable                                                                                                             | 0                                                                                                                             | 0                                      |
| -age                                        | n         | 2: bandage, carriage                                                                                                                                                                                                                             | 1: package                                                                                                                   | 1: village                                                                                                                    | 1: passage                             |
| -al <sup>1</sup>                            | adj       | 2: real, special                                                                                                                                                                                                                                 | 1: musical                                                                                                                   | 1: normal                                                                                                                     | 2: central, magical                    |
| -al <sup>2</sup>                            | n         | 4: animal, cereal, hospital, pedals                                                                                                                                                                                                              | 0                                                                                                                            | 1: initials                                                                                                                   | 4: aerial, capitals, material, recital |
| -an <sup>1/2</sup>                          | adj/<br>n | 2: Indian, Dalmatian                                                                                                                                                                                                                             | 2: American, European                                                                                                        | 0                                                                                                                             | 3: human, Italian, Alsations           |
| -ance                                       | n         | 1: ambulance                                                                                                                                                                                                                                     | 1: nuisance                                                                                                                  | 0                                                                                                                             | 1: distance                            |
| -ancy                                       | n         | 0                                                                                                                                                                                                                                                | 0                                                                                                                            | 0                                                                                                                             | 0                                      |
| -ant <sup>1</sup>                           | adj       | 2: brilliant, important                                                                                                                                                                                                                          | 0                                                                                                                            | 0                                                                                                                             | 0                                      |
| -ant <sup>2</sup>                           | n         | 1: hydrant                                                                                                                                                                                                                                       | 1: restaurant                                                                                                                | 0                                                                                                                             | 0                                      |
| -ary <sup>1</sup>                           | adj       | 0                                                                                                                                                                                                                                                | 1: contrary                                                                                                                  | 1: Primary                                                                                                                    | 1: ordinary                            |
| -ary <sup>2</sup>                           | n         | 0                                                                                                                                                                                                                                                | 0                                                                                                                            | 2: anniversary, library                                                                                                       | 0                                      |
| -ate <sup>1</sup>                           | adj       | 1: desperate                                                                                                                                                                                                                                     | 0                                                                                                                            | 0                                                                                                                             | 1: private                             |
| -ate <sup>2</sup>                           | n         | 0                                                                                                                                                                                                                                                | 0                                                                                                                            | 0                                                                                                                             | 1: privates                            |
| -ate <sup>3</sup>                           | v         | 0                                                                                                                                                                                                                                                | 0                                                                                                                            | 1: complicate                                                                                                                 | 1: decorate                            |
| -ation                                      | n         | 1: information                                                                                                                                                                                                                                   | 0                                                                                                                            | 1: invitation                                                                                                                 | 0                                      |
| -cy                                         | n         | 0                                                                                                                                                                                                                                                | 0                                                                                                                            | 0                                                                                                                             | 0                                      |
| -en <sup>1</sup>                            | v         | 4: fasten, frighten, loosen, tighten                                                                                                                                                                                                             | 4: flatten, sharpen, straighten, waken                                                                                       | 1: threaten                                                                                                                   | 1: sweeten                             |
| -en <sup>2</sup>                            | adj       | 0                                                                                                                                                                                                                                                | 1: wooden                                                                                                                    | 0                                                                                                                             | 1: olden                               |
| -ence                                       | n         | 2: patience, licence                                                                                                                                                                                                                             | 1: evidence                                                                                                                  | 2: difference, science                                                                                                        | 0                                      |
| -ency                                       | n         | 0                                                                                                                                                                                                                                                | 0                                                                                                                            | 0                                                                                                                             | 1: emergency                           |
| -ent <sup>1</sup>                           | adj       | 1: different                                                                                                                                                                                                                                     | 0                                                                                                                            | 1: silent                                                                                                                     | 0                                      |
| -ent <sup>2</sup>                           | n         | 1: accident                                                                                                                                                                                                                                      | 1: ingredients                                                                                                               | 2: detergent, President                                                                                                       | 0                                      |
| -er <sup>1</sup><br>(animate, agentive)     | n         | 14: (ant)eaters, babysitter, baker, camper, drinker, driver, farmer, inn+keeper, player, shopper, sucker, teacher, (piano) tuner, toddler                                                                                                        | 13: dancer, fisherman, fixers; gardener, grasshopper, killer, maker, payers, ranger, Roadrunner, rooster, Woodpecker, worker | 12: biker, builders, buyer, Gnasher, hairdresser, helper, joker, Rider, robber, Romper_Room, singer, winner                   | 4: commander, peeker, racer, squealer  |
| -er <sup>2</sup><br>(animate, non-agentive) | n         | 2: passengers, thumber                                                                                                                                                                                                                           | 2: bleeder, piper                                                                                                            | 3: customer, grocer, smasher                                                                                                  | 1: officer                             |
| -er <sup>3</sup> -<br>(inanimate, agentive) | n         | 29: blender, bouncer, cracker, cutter, digger, dumper, duster, freezer, heater, Land_Rover, lawnmower, lighter, mixer, pacifier, player, pliers, puffer, recorder, roadgrader, rocker, roller, scooter, screw+driver, soother, sticker, trailer, | 6: blower, dryer, eraser, grabber, hooter, sweeper                                                                           | 14: booster, buzzer, choker, computer, cooker, curlers, flippers, glider, opener, server, shaker, sparkler, speaker, toasters | 3: bomb+tester, stabilizers, washer    |

# Profiling complex word usage in pre-schoolers

| Suffix                                            | PoS       | 2;0 – 2;6                                                                                                                                                                                                                                                                                                                                      | 3;0 – 3;6                                                                                                               | 4;0 – 4;6                                                                                                                         | 5;0 – 5;6                                             |
|---------------------------------------------------|-----------|------------------------------------------------------------------------------------------------------------------------------------------------------------------------------------------------------------------------------------------------------------------------------------------------------------------------------------------------|-------------------------------------------------------------------------------------------------------------------------|-----------------------------------------------------------------------------------------------------------------------------------|-------------------------------------------------------|
|                                                   |           | typewriter,<br>vacuum+cleaner, wiper                                                                                                                                                                                                                                                                                                           |                                                                                                                         |                                                                                                                                   |                                                       |
| -er <sup>4</sup><br>(inanimate, non-agentive)     | n         | 8: bulldozer, drawer, dresser, folder, ruler, slipper, sweater, wheeler                                                                                                                                                                                                                                                                        | 4: bumpers, poster, stroller, walker                                                                                    | 6: blusher, camper, decker, dipper, rubber, trainers                                                                              | 2: carrier, wrapper                                   |
| -ery                                              | n         | 4: bakery, dairy, grocery, nursery                                                                                                                                                                                                                                                                                                             | 0                                                                                                                       | 1: jewellery                                                                                                                      | 2: cookery, pastry                                    |
| -ese <sup>1/2</sup>                               | adj       | 0                                                                                                                                                                                                                                                                                                                                              | 0                                                                                                                       | 1: Chinese                                                                                                                        | 1: Siamese                                            |
| -ess                                              | n         | 1: princess                                                                                                                                                                                                                                                                                                                                    | 0                                                                                                                       | 0                                                                                                                                 | 0                                                     |
| -et                                               | n         | 9: blanket, closet, jacket, packet, pocket, poppet, puppet, tablet, toilet                                                                                                                                                                                                                                                                     | 1: bracelet                                                                                                             | 2: bullet, helmet                                                                                                                 | 4: cornet, midget, tuffet, violet                     |
| -ette                                             | n         | 2: barrette, cigarette                                                                                                                                                                                                                                                                                                                         | 0                                                                                                                       | 0                                                                                                                                 | 0                                                     |
| -ful <sup>1</sup>                                 | adj       | 3: beautiful, careful, cheerful                                                                                                                                                                                                                                                                                                                | 1: awful                                                                                                                | 3: graceful, powerful, wonderful                                                                                                  | 0                                                     |
| -ful <sup>2</sup>                                 | n         | 0                                                                                                                                                                                                                                                                                                                                              | 1: pocketful                                                                                                            | 1: handful                                                                                                                        | 1: spoonful                                           |
| -ian <sup>1</sup>                                 | adj       | 0                                                                                                                                                                                                                                                                                                                                              | 0                                                                                                                       | 0                                                                                                                                 | 0                                                     |
| -ian <sup>2</sup>                                 | n         | 0                                                                                                                                                                                                                                                                                                                                              | 0                                                                                                                       | 1: magician                                                                                                                       | 0                                                     |
| -ible                                             | adj       | 2: horrible, terrible                                                                                                                                                                                                                                                                                                                          | 0                                                                                                                       | 0                                                                                                                                 | 2: impossible, sensible                               |
| -ic <sup>1/2</sup>                                | adj/<br>n | 4: comic, elastic, magic, music                                                                                                                                                                                                                                                                                                                | 5: automatic, mechanics, plastic, terrific, tonic                                                                       | 2: fantastic, prehistoric                                                                                                         | 0                                                     |
| -ie/y <sup>1</sup><br>(suffix added to free base) | n         | 34: aunt-ie/y, ball-ie/y, bed-ie/y, bib-ie/y, bird-ie/y, bisquit-ie/y, booby-pl, book-ie/y, cat-ie/y, chick-ie/y, cup-ie/y, dog-ie/y, doll-ie/y, duck-ie/y, dummy, dressy, egg-ie/y, fish-ie/y, frog-ie/y, girl-ie/y, good-ie/y, horse-ie/y, mole-y, mouse-ie/y, nannie-y, nuddy, pig-ie/y, poeey, pot-ie/y, puppy, pussy, shirt-y, sweet-ie/y | 13: biggie, black-y, butt-ies, cake-y, farm-y, gold-y, hand-ies, job-ies, rosey, shovel-y, steam-y, thing-y, tooth-ie/y | 13: baddie, baldy, crawl-ies, dicky, drink-ie/y, house-ie/y, kid-ies, nose-ies, poop-ie/y, snake-ie/y, tip-y, toes-ies, wink-ie/y | 5: boot-ies, mean-ies, owl-ie/y, train-ies, wheel-ies |
| -ie/y <sup>2</sup><br>(unknown base)              | n         | 1: bunny                                                                                                                                                                                                                                                                                                                                       | 0                                                                                                                       | 0                                                                                                                                 | 0                                                     |
| -ie/y <sup>3</sup><br>(truncated base)            | n         | 13: bickie, brekkie, budgie, card-ie/y, granny, jam-ie/y-pl, kitty, movie, nap-ie/y, teddy, tellie/y, tummy, well-ie/y                                                                                                                                                                                                                         | 3: hankie, nighties, panties                                                                                            | 0                                                                                                                                 | 1: pinny                                              |
| -ify                                              | v         | 0                                                                                                                                                                                                                                                                                                                                              | 0                                                                                                                       | 0                                                                                                                                 | 2: magnify, satisfy                                   |
| -ion                                              | n         | 6: condition, connection, expression, station, television, vacation                                                                                                                                                                                                                                                                            | 2: Coronation, directions                                                                                               | 6: action, construction, injection, invention, prescription, question                                                             | 4: decoration, lotion, permission, reflection         |
| -ish <sup>1</sup>                                 | adj       | 0                                                                                                                                                                                                                                                                                                                                              | 1: ticklish                                                                                                             | 1: greenish                                                                                                                       | 1: pinkish                                            |
| -ish <sup>2</sup>                                 | n         | 0                                                                                                                                                                                                                                                                                                                                              | 1: Englishman                                                                                                           | 0                                                                                                                                 | 1: Spanish                                            |

# Profiling complex word usage in pre-schoolers

| Suffix                          | PoS       | 2;0 – 2;6                                                                                                                                                                                                                                                                                                                                                              | 3;0 – 3;6                                                                                                                                                 | 4;0 – 4;6                                                                                                                                                                     | 5;0 – 5;6                                                                                                                                                                            |
|---------------------------------|-----------|------------------------------------------------------------------------------------------------------------------------------------------------------------------------------------------------------------------------------------------------------------------------------------------------------------------------------------------------------------------------|-----------------------------------------------------------------------------------------------------------------------------------------------------------|-------------------------------------------------------------------------------------------------------------------------------------------------------------------------------|--------------------------------------------------------------------------------------------------------------------------------------------------------------------------------------|
| -ist <sup>1/2</sup>             | adj/<br>n | 0                                                                                                                                                                                                                                                                                                                                                                      | 0                                                                                                                                                         | 1: artist                                                                                                                                                                     | 1: dentist                                                                                                                                                                           |
| -ition                          | n         | 0                                                                                                                                                                                                                                                                                                                                                                      | 0                                                                                                                                                         | 0                                                                                                                                                                             | 1: positions                                                                                                                                                                         |
| -ity                            | n         | 0                                                                                                                                                                                                                                                                                                                                                                      | 1: University                                                                                                                                             | 1: infinity                                                                                                                                                                   | 2: activity, cavity                                                                                                                                                                  |
| -ive                            | adj       | 0                                                                                                                                                                                                                                                                                                                                                                      | 0                                                                                                                                                         | 2: expensive, massive                                                                                                                                                         | 2: negative, positive                                                                                                                                                                |
| -ize                            | v         | 0                                                                                                                                                                                                                                                                                                                                                                      | 0                                                                                                                                                         | 1: hypnotize                                                                                                                                                                  | 2: realize, recognize                                                                                                                                                                |
| -less                           | adj       | 0                                                                                                                                                                                                                                                                                                                                                                      | 0                                                                                                                                                         | 0                                                                                                                                                                             | 0                                                                                                                                                                                    |
| -ly <sup>1</sup>                | adj       | 2: lovely, poorly                                                                                                                                                                                                                                                                                                                                                      | 5: cowardly, early, friendly, lonely, ugly                                                                                                                | 0                                                                                                                                                                             | 0                                                                                                                                                                                    |
| -ly <sup>2</sup>                | adv       | 9: carefully, exactly, exceptionally, gently, merrily, nearly, only, properly, really                                                                                                                                                                                                                                                                                  | 13: actually, awfully, easily, generally, immediately, mostly, perfectly, probably, quickly, quietly, slowly, suddenly, usually                           | 4: certainly, differently, especially, hardly                                                                                                                                 | 7: definitely, finally, fully, happily, neatly, nicely, normally                                                                                                                     |
| -ment                           | n         | 4: basement, equipment, movement, pavement                                                                                                                                                                                                                                                                                                                             | 1: moment                                                                                                                                                 | 3: amusements, department, instrument                                                                                                                                         | 2: apartment, arguments                                                                                                                                                              |
| -ness                           | n         | 2: goodness, happiness                                                                                                                                                                                                                                                                                                                                                 | 0                                                                                                                                                         | 1: business                                                                                                                                                                   | 0                                                                                                                                                                                    |
| -or <sup>1</sup> -<br>(animate) | n         | 1: doctor                                                                                                                                                                                                                                                                                                                                                              | 1: conductor                                                                                                                                              | 1: visitors                                                                                                                                                                   | 4: actors, governor, operator, Professor                                                                                                                                             |
| -or <sup>2</sup><br>(inanimate) | n         | 5: excavator, motor, radiator, refrigerator, tractor                                                                                                                                                                                                                                                                                                                   | 0                                                                                                                                                         | 0                                                                                                                                                                             | 1: calculator                                                                                                                                                                        |
| -ous                            | adj       | 3: dangerous, delicious, loquacious                                                                                                                                                                                                                                                                                                                                    | 2: gracious, scrumptious                                                                                                                                  | 0                                                                                                                                                                             | 8: enormous, famous, marvellous, poisonous, precious, ridiculous, serious, unconscious                                                                                               |
| -y                              | adj       | 47: angry, baggy, bendy, bloody, bouncy, bubbly, cheeky, cloudy, crazy, curly, dirty, dizzy, empty, fizzie (drink), funny, gooey, greeny, happy, hungry, itchy, juicy, lumpy, messy, mucky, muddy, naughty, noisy, pretty, rainy, roly, runny, sleepy, soggy, steady, sticky, stinky, sunny, tatty, thirsty, tickly, tiny, waggly, wiggly, windy, wobbly, yucky, yummy | 20: bitty, bumpy, creamy, easy, fluffy, fraidy+cat, furry, fuzzy, greedy, jiggity, lucky, milky, mushy, poopy, shiny, stripy, tasty, teeny, toothy, zippy | 22: beady, burn-y, chatty, chewy, creepy, dinky, fatty, foggy, frisky, glue-y, greasy, grizzly, grumpy, healthy, powdery, salty, sandy, scary, snowy, spiky, squashy, squishy | 21: bear-y, chocolate-y, crunchy, handy, hump-y, icky, licky, picky, poisony, scratchy, scribbly, scruffy, silky, skinny, slippy, sloppy, sneeze-y, speedy, spotty, squeaky, sweep-y |
| <b>Totals</b>                   |           | <b>228</b>                                                                                                                                                                                                                                                                                                                                                             | <b>111</b>                                                                                                                                                | <b>116</b>                                                                                                                                                                    | <b>103</b>                                                                                                                                                                           |
